# Supplementary material for: Bio-inspired synthesis of N-doped TiO2/C nanocrystals using jellyfish mucus with high visible-light photocatalytic efficiency
Source: Royal Society of Chemistry journal article supplement (doi:10.1039/d4na00309h), 2024-01-01
Supplement: d4na00309h1.pdf [file d4na00309h1.pdf]

1  
2  
3  
4  
5  
6  
7  
8  
9  
10  
11  
12  
13  
14  
15  
16  
17  
18  
19  
20  
21  
22  
23  
24  
25  
26  
27  
28

## Supporting information

### **Bio-inspired synthesis of N-doped TiO<sub>2</sub>/C nanocrystals by jellyfish mucus with high visible-light photocatalytic efficiency**

**Song Feng<sup>a, b\*</sup>, Lingchen Liu<sup>c\*\*</sup>, Jianing Lin<sup>d, e\*\*</sup>, Ziwei Wang<sup>f</sup>, Jinzeng Gu<sup>d, e</sup>, Lutao Zhang<sup>d, e</sup>,**

**Bin Zhang<sup>c\*\*</sup>, Song Sun<sup>a, b</sup>**

<sup>a</sup>CAS Key Laboratory of Marine Ecology and Environmental Sciences, Institute of Oceanology,

Chinese Academy of Sciences, Qingdao 266071, China

<sup>b</sup>College of Marine Science, University of Chinese Academy of Sciences, Qingdao, China

<sup>c</sup>School of Food and Biotechnology, Xihua University, Chengdu 610039, China

<sup>d</sup>Institute of Eco-Environmental Forensics, Shandong University, Qingdao 266237, China

<sup>e</sup>Laboratory for Marine Ecology and Environmental Science, Qingdao Marine Science and

Technology Center, Qingdao 266237, China

<sup>f</sup>Liaoning University, Shenyang 110036, China

E-mail address for the first author: fengsong@qdio.ac.cn

\*\*To whom correspondence should be addressed. E-mail: linjianing@sdu.edu.cn,

lingchen2773@163.com, 0720060057@mail.xhu.edu.cn.

29 S1 Introduction

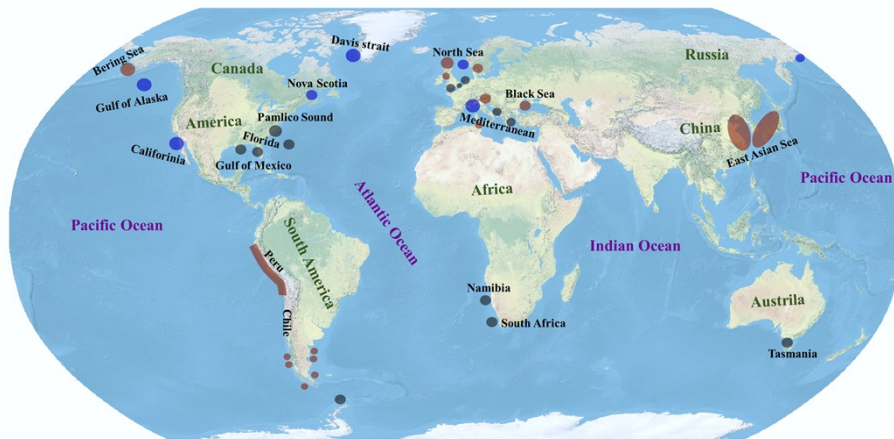

30

31 **Fig. S1** Distribution of jellyfish blooms around the world. Colors indicate trends in jellyfish

32 abundance over time by the end of 2011. Red sign: significant increase, blue sign: significant

33 decrease, gray sign: no trend<sup>1</sup>.

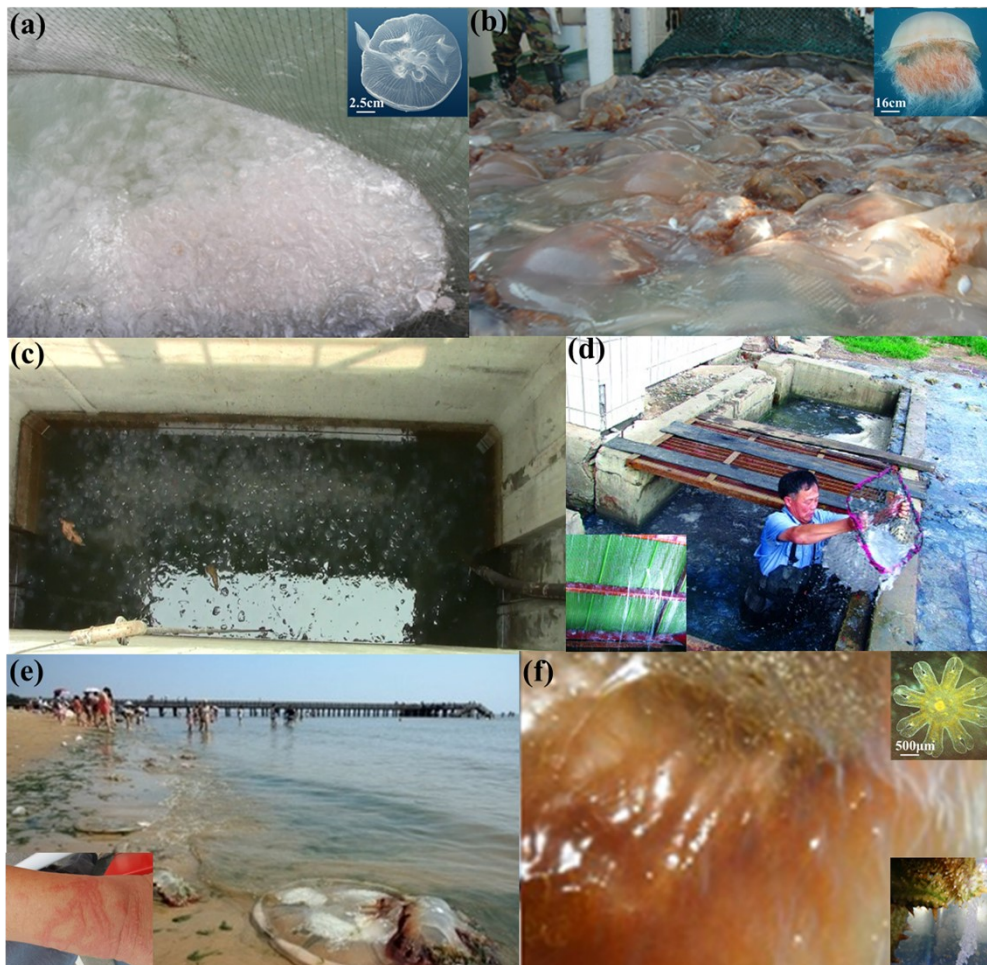

34

35 **Fig. S2** Blooms of *Aurelia coerulea* and *Nemopilema nomurai* in the coastal sea of China and their  
36 damages. (a) Massive *A. coerulea* medusae (top right corner) bloomed inshore the Bohai, China. (b)  
37 *N. nomurai* medusae (top right corner) bloomed in large numbers in Bohai, Yellow and East China  
38 seas. (c) Massive aggregation of *A. coerulea* medusae by accident clogged the cooling water intakes  
39 seriously in a nuclear power plant, China, causing machine halt for approximately one week and  
40 economic loss of over 10 million RMB one day in July 2014<sup>2</sup>. (d) A serious clog of cooling water  
41 intakes (top right corner) by the massive aggregation of *A. coerulea* medusae appearing in the  
42 Qingdao power plant threatened the normal power supply of partial areas in July 2009<sup>3</sup>. (e) *N.*  
43 *nomurai* medusae massively appeared around some famous beaches, in Qin Huangdao, China in  
44 August, resulting in some stinging cases (top right corner)<sup>4</sup>. (f) Large amounts of *A. coerulea*  
45 ephyrae (top right corner) bloomed in many sea cucumber farming ponds constructed by artificial  
46 reefs in Dongying, China in spring, which have been regarded as the cause of sea cucumber vomiting  
47 (bottom right corner)<sup>5</sup>.

48 **Table S1** Some reports on the synthesis of C, N modified TiO<sub>2</sub> nanocrystals by the use of  
49 bioorganic matter from nature as nonmetal element sources.

| Method                       | TiO <sub>2</sub> Precursor | Type of bioorganic matter                                                                              | k (min <sup>-1</sup> ) | Ref |
|------------------------------|----------------------------|--------------------------------------------------------------------------------------------------------|------------------------|-----|
| Sol-gel and calcination      | Tetrabutyl titanate (TBT)  | Butterfly wings of <i>Papilio paris</i>                                                                | 0.02614                | 6   |
| Biomimetic template approach | TBT                        | Banana ( <i>Musa acuminata</i> ) stem fiber                                                            | 0.0052                 | 7   |
| Biomimetic template approach | TBT                        | Polydopamine (PDA) spheres                                                                             | —                      | 8   |
| Biomimetic template approach | Titanium trichloride       | Lotus pollen                                                                                           | —                      | 9   |
| Hydrothermal method          | TBT                        | Chicken feathers                                                                                       | 0.0542                 | 10  |
| Biomimetic template approach | Titanium (IV) butoxide     | Egg white protein                                                                                      | 0.00669                | 11  |
| Calcination                  | Titanium isopropoxide      | <i>Ricinus Communis</i> , <i>Moringa Oleifera</i> ,<br><i>Bougainvillea Spectabilis</i> plant extracts | —                      | 12  |
| Hydrothermal method          | TBT                        | Extrapallial fluid of Fresh water mussels ( <i>Cristaria plicata</i> )                                 | —                      | 13  |

50 k: the first order rate constant of C, N modified TiO<sub>2</sub> nanocrystals.

## 51 S2 Experimental section

### 52 S2.1 Extraction of jellyfish mucus proteins

53 Fresh medusae of *A. coerulea* and *N. nomurai* with the respective umbrella diameters of  
54 approximately 10~15 cm and 50~80 cm were captured in June and August in the coastal waters of  
55 Qingdao, China, respectively. The entire medusae in *A. coerulea* and partial oral arms in *N. nomurai*  
56 were rinsed thoroughly with fresh seawater filtered through a 0.45  $\mu\text{m}$  hybrid fibre membrane,  
57 respectively. Afterwards, their mucus was collected into 50 mL centrifuges on ice by funnels  
58 containing a layer of medical gauze (Fig. S3). Then the obtained mucus was centrifuged at  
59 4000~12000 rpm for 10 min to remove impurities. The supernatant was extracted by a disposable  
60 syringe.

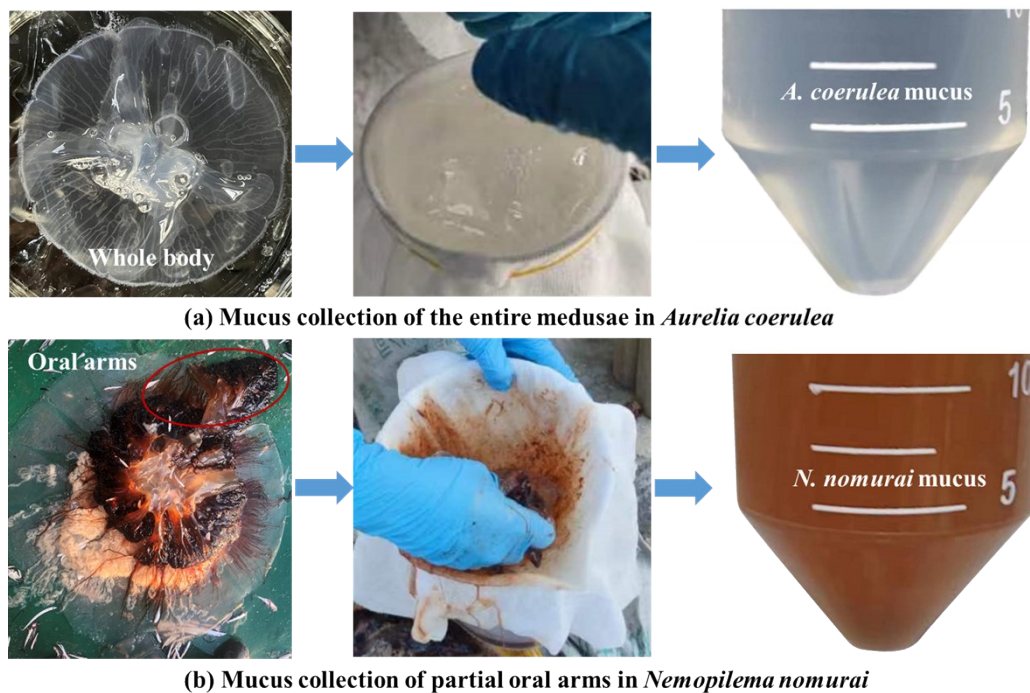

61

62 **Fig. S3** Mucus collection of the entire medusae in *Aurelia coerulea* (a) and partial oral arms in

63 *Nemopilema nomurai* (b)

### 64 S2.2 Analysis of jellyfish mucus proteins

65 The protein concentration of *A. coerulea* and *N. nomurai* mucus was determined using the

66 Bradford Assay (Bradford, 1976). The proteins in the mucus were detected by 10% sodium dodecyl  
67 sulphate-polyacrylamide gel electrophoresis (SDS-PAGE). For sample preparation, jellyfish mucus  
68 proteins were mixed with SDS-PAGE protein loading buffer (5×) at a ratio of 4 μL to 1 μL. The  
69 mixture was then heated to 100°C for 5 min to ensure proper denaturation of the proteins.  
70 Subsequently, 30 μL of the prepared mixture was added to each sampling well in the gel. The gel  
71 was subjected to electrophoresis at a voltage of 80 v using the electrophoresis apparatus. After  
72 electrophoresis, the gel was stained with Commassie Blue Fast Staining Solution and photographed  
73 after 5 min.

74 The standard curves of proteins were determined as follows. The various volumes (i.e., 0, 3, 5,  
75 7, and 9 μL) of Bovine Serum Albumin (BSA) standard liquid (1 mg•mL<sup>-1</sup>) were added to 96-well  
76 plates, which were supplemented with PBS buffer solution to 10 μL. After uniform mixing, 200 μL  
77 Commassie Blue G250 staining solution was added to each well. The absorbance of samples was  
78 measured at 595 nm by a microplate reader (MD VersaMax) after being mixed for 30 s and then left  
79 at room temperature for 5 min. The standard curves of sample proteins were finally obtained in Fig.  
80 S4. The horizontal coordinate ( $x$ ) represented the absorbance, and the vertical coordinates ( $y$ )  
81 represented the protein concentration (μg/L). The corresponding linear regression equation was  
82 described as follows:

83 
$$y=1611.08101x-892.57658, R^2=0.999 \quad (1)$$

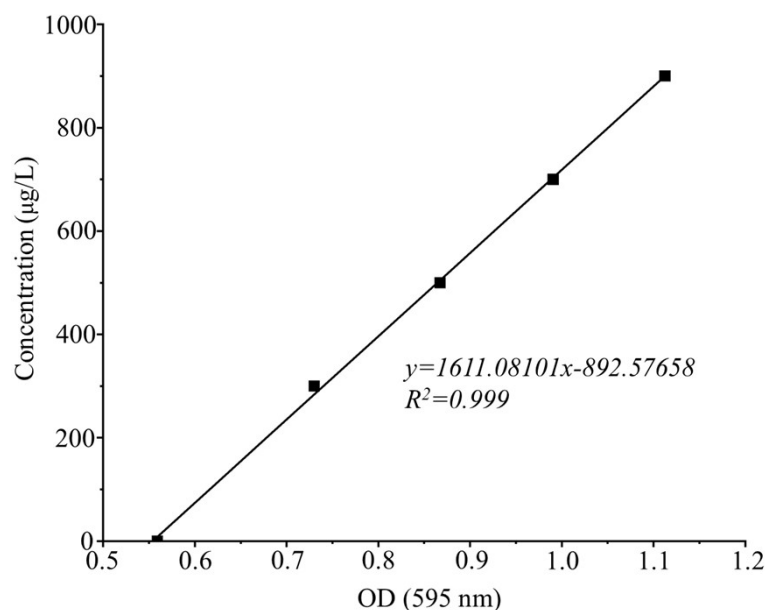

84

85

**Fig. S4** Standard curve of Bovine Serum Albumin (BSA)

86

The mucus protein concentration of *A. coerulea* and *N. nomurai* were eventually calculated

87

based on the linear regression equation by sampling 10 µL. The mucus proteins were finally diluted

88

or concentrated to the designed concentration ( $600 \mu\text{g}\cdot\text{mL}^{-1}$ ) as the dopants for the synthesis of the

89

modified  $\text{TiO}_2$  nanocrystals by referring to the reports of Zeng et al. (2015)<sup>13</sup>.

### 90 S2.3 Synthesis of $\text{TiO}_2$ materials

91

The schematic of the synthetic process of modified  $\text{TiO}_2$  nanocrystals by using proteins of *A.*

92

*coerulea* and *N. nomurai* mucus as dopants was described in Fig. 1. Three volumes of mucus

93

proteins (10 mL, 20 mL and 30 mL) in *A. coerulea* and *N. nomurai*, were separately added to 5 mL

94

of tetrabutyl titanate (TBT, 97%, Sigma-Aldrich) in a 50 mL beaker with the volume ratios of 2:1,

95

4:1 and 6:1. They were constantly stirred for 2 h at  $300 \text{ rpm}\cdot\text{min}^{-1}$ . After 4h mineralization without

96

stirring, the mixture (i.e., jellyfish mucus and TBT) was transferred to a Teflon-lined autoclave and

97

preheated at  $50^\circ\text{C}$  for 30 min. Then temperature was adjusted to  $150^\circ\text{C}$  at a heating rate of

98

$5^\circ\text{C}\cdot\text{min}^{-1}$ . The heat treatment process at  $150^\circ\text{C}$  lasted for 12 h. When the reactor naturally cooled



99 to the room temperature, the mixture containing the light brown precipitate and liquid appeared  
100 (Fig. S5a). Afterwards, the precipitate was collected by firstly centrifugation at  $4000 \text{ rpm} \cdot \text{min}^{-1}$  for  
101 10 min, followed by separately washed with anhydrous ethanol and distilled water for 3 times, and  
102 dried at  $55^\circ\text{C}$  for 12 h. The modified  $\text{TiO}_2$  nanocrystals were finally obtained after thorough grinding  
103 (Fig. S5b), which were denoted as JAT for *A. coerulea* and JNT for *N. nomurai*, respectively.  
104 According to the volume ratio between their mucus proteins utilized and TBT, the 6  $\text{TiO}_2$   
105 nanocrystals were abbreviated as JAT-2, JAT-4, and JAT-6, as well as JNT-2, JNT-4, and JNT-6,  
106 respectively.

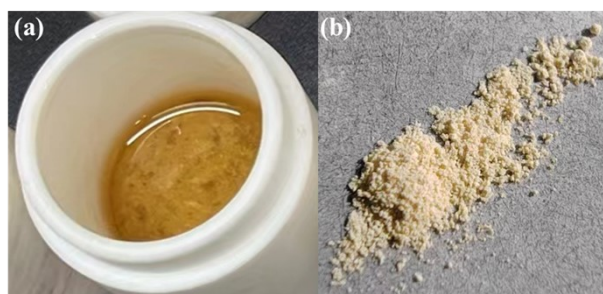

107  
108 **Fig. S5** Light brown precipitate and liquid after hydrothermal treatment (a) and eventually  
109 prepared modified  $\text{TiO}_2$  nanocrystals (b) after grinding by using *N. nomurai* mucus as the dopants.

#### 110 **S2.4 Characterization of materials**

111 The morphology of the obtained modified  $\text{TiO}_2$  samples was characterized by the scanning  
112 electron microscopy (SEM, TESCAN MIRA LMS) and transmission electron microscopy (TEM,  
113 JEOL JEM 2100F). For SEM, the sample could be directly observed on the sample table with  
114 conductive adhesive. For TEM, the sample was firstly ultrasonic dispersed in anhydrous ethanol to  
115 form a uniform solution, and then dropped onto a micro-grid copper net for observation. The  
116 crystalline phase was analyzed by X-ray diffraction (XRD, Rigaku SmartLab SE) with  $\text{Cu-K}\alpha$   
117 radiation (operation voltage of 40 kV and current of 40 mA). The scan was collected between 10  
118 and 80 degrees at the scanning rate of  $2^\circ/\text{min}$ . The nitrogen adsorption-desorption isotherms were

119 measured by an automatic adsorption unit (Quantachrome Autosorb IQ) at 196°C after degassing  
120 of samples for 8 h. The pore surface, volume and diameter distribution were determined by Barrett-  
121 Joyner-Halenda (BJH) method. The X-ray photoelectron spectroscopy (XPS, Thermo Scientific K-  
122 Alpha) was used to determine the surface element composition, chemical bonding valence states,  
123 and charge distribution of the sample. The UV-vis absorption spectra of the samples were measured  
124 by Shimadzu UV-3600i Plus equipped with an integrating sphere attachment, using BaSO<sub>4</sub> as the  
125 reference in the wavelength range of 200~800 nm. Photoluminescence (PL) spectra were obtained  
126 (Edinburgh FLS1000) with a 300~700 nm excitation wavelength to reveal the process of separation,  
127 migration and recombination of photogenerated electron-hole and compare the lifetime of  
128 photogenerated carrier. The active radicals during the photocatalytic reaction process were  
129 identified using electron paramagnetic resonance spectrometer (ESR, Bruker EMXplus-6/1) at the  
130 magnetic field strength of 3510G. Electrochemical impedance spectroscopy (EIS) was analyzed  
131 using CHI760E. The photocatalyst was dispersed in 1 mL of ultrapure water solution and then 50  
132 μL nafion solution was added. The uniform suspension was formed by ultrasonication for 30 min.  
133 Afterwards, 150 μL of suspension was added onto ITO glass and dried at room temperature for  
134 optoelectronic test at the CHI760E electrochemical workstation. The Ag/AgCl was the reference  
135 electrode, and the Pt wire was the contrast electrode. Each photocatalyst was the working electrode,  
136 and the electrolyte was 0.5 mol·L<sup>-1</sup> potassium ferricyanide solution. The EIS frequency was 0.1~100  
137 Khz. The radius of EIS curve impedance can reflect the conductivity of photocatalyst.

## 138 **S2.5 Photocatalytic activity measurement**

139 The photocatalytic activity of the samples was evaluated by the degradation of Rhodamine B  
140 (RhB) dye under visible-light irradiation. The 500 W mercury lamp equipped with 400 nm filter



141 was used as a light source. 10 mg samples were added into 10 mL RhB (0.01 mM) aqueous solution.  
 142 After the solution was stirred for 30 min in the dark, it was exposed to the visible light. 1 mL solution  
 143 was taken out by pipettes every 5 min, and the supernatant was obtained by centrifugation. The  
 144 concentration of the degradation solution was determined by the absorbance at 554 nm using a  
 145 microplate reader. The degradation rates ( $D$ , %) of RhB were calculated as follows Eq. (1):

$$146 \quad D = (C_0 - C_t) / C_0 \times 100\% \quad (2)$$

147 where  $C_0$  (mmol/L) is the initial RhB concentration (ppm), and  $C_t$  (mmol/L) is the RhB  
 148 concentration at time  $t$ .

149 In order to better evaluate the reusability and stability of prepared photocatalysts, cyclic  
 150 experiments were conducted. After each cycle experiment, the photocatalyst was repeatedly washed  
 151 with ultrapure water and anhydrous ethanol, and then placed in a beaker and boiled with ultrapure  
 152 water to remove residual organic molecules. Subsequently, the photocatalyst was dried at 60°C, and  
 153 the above experiment was repeated three times.

154 **Table S2** Experimental apparatus used in this study

| Instrument name                  | Instrument model | Manufacturer                                           |
|----------------------------------|------------------|--------------------------------------------------------|
| Photochemical reaction apparatus | BA-GHX1          | Bayue Instrument Co., Ltd, Changsha, China             |
| Muffle furnace                   | HAD-TE0912       | Heng odd Instrument Co., Ltd, Beijing, China           |
| Electro-thermostatic blast oven  | DHG-9245A        | Yiheng17 Instrument Co., Ltd, Shanghai, China          |
| Heating Magnetic Stirrer         | HJ-6A            | Guohua Instrument Co., Ltd, Changzhou, China           |
| Microplate reader                | MD VersaMax      | Molecular Devices                                      |
| Electrophoresis apparatus        | JY-CZ-B          | Junyi Electrophoresis Ltd, Beijing, China              |
| Ultrapure water machine          | RODI-220A        | ResearchScientific Instruments Co., Ltd, Xiamen, China |
| Ultrasonic cleaners              | KQ-300E          | Supmile Instruments Co., Ltd,                          |

|                                                 |                             |                                                                                     |
|-------------------------------------------------|-----------------------------|-------------------------------------------------------------------------------------|
| Refrigerated centrifuge<br>Turbine mixer        | Centrifuge 5810R<br>VM-500S | Kunshan, China<br>Eppendorf Co., Ltd, Germany<br>Joanlab Co., Ltd, Huzhou,<br>China |
| Analytical balance                              | BAS2245-CW                  | Sartorius Co., Ltd, Germany                                                         |
| X-ray diffractometer                            | Rigaku SmartLab SE          | Rigaku Co., Ltd, Japan                                                              |
| SEM                                             | TESCAN MIRA LMS             | Tescan Co., Ltd, Czech<br>Republic                                                  |
| TEM                                             | JEOL JEM 2100F              | Rigaku Co., Ltd, Japan                                                              |
| Automatic surface and porosity<br>analyzer      | Quantachrome Autosorb IQ    | Quantachrome Co., Ltd, USA                                                          |
| X-ray photoelectron<br>spectroscopy             | Thermo Scientific K-Alpha   | Thermo Fisher Scientific Co.,<br>Ltd, USA                                           |
| UV-vis spectrophotometer                        | Shimadzu UV-3600i Plus      | Shimadzu Co., Ltd, Japan                                                            |
| Fluorescence<br>spectrophotometer               | Edinburgh FLS1000           | Edinburgh Co., Ltd, UK                                                              |
| Electron Paramagnetic<br>Resonance Spectrometer | Bruker EMXplus-6/1          | Bruker Co., Ltd, Germany                                                            |

### 155 S3 Results and discussions

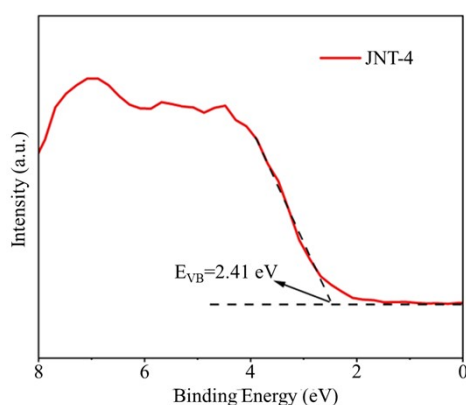

156

157 **Fig. S6** XPS valence band spectra of JNT-4 nanocrystal.

### 158 References

159 1 R. H. Condon, C. M. Duarte, K. A. Pitt, K. L. Robinson, C. H. Lucas, K. R. Sutherland, H. W.

160 Mianzan, M. Bogeberg, J. E. Purcell, M. B. Decker, S. Uye, L. P. Madin, R. D. Brodeur, S. H. D.

161 Haddock, A. Malej, G. D. Parry, E. Eriksen, J. Quinones, M. Acha, M. Harvey, J. M. Arthur and

162 W. M. Graham, Recurrent jellyfish blooms are a consequence of global oscillations, *P. Natl Acad.*

163 *Sci. USA*, 2013, **110**, 1000-1005.

164 2 J. Li, X. Liu, J. Zhang and Y. Meng, Research on marine biological detection technology to  
165 improve the safety of cooling water source in nuclear power plants, *Electrical. Secur.*, 2017, **10**, 32-  
166 37 (in Chinese).

167 3 L. Ren, Jellyfish attacked on a power plant in Qingdao possibly resulting in the shutdown or  
168 affecting the power supply of 1/3 areas, *Qingdao News*, 2009, 7-8. (in Chinese).

169 4 S. Feng, S. Sun, C. Li and F. Zhang, Controls of *Aurelia coerulea* and *Nemopilema nomurai*  
170 (Cnidaria: Scyphozoa) blooms in the coastal sea of China: Strategies and measures, *Front. Mar.*  
171 *Sci.*, 2022, **9**, 946830.

172 5 Z. Dong, Blooms of the moon jellyfish *Aurelia*: Causes, consequences and controls, *World seas:*  
173 *An environmental evaluation: Volume III: Ecological issues and environmental impacts*, 2019, 163-  
174 170.

175 6 J. Li, L. Gao and W. Gan, Bioinspired C/TiO<sub>2</sub> photocatalyst for rhodamine B degradation under  
176 visible light irradiation, *Front. Agr. Sci. Eng.*, 2017, **4**, 459-464.

177 7 R. Purbia, R. Borah and S. Paria, Carbon-doped mesoporous anatase TiO<sub>2</sub> multi-tubes  
178 nanostructures for highly improved visible light photocatalytic activity, *Inorg. Chem.*, 2017, **56**,  
179 10107-10116.

180 8 Y. Huang, K. Chen, M. Huang, R. Bi, Z. Li, Y. Zhu, M. Tang, Z. Tong, Y. Ye and M. Zhu,  
181 Versatile polydopamine-mediated growth of N and C co-doped hollow porous TiO<sub>2</sub> spheres with  
182 oxygen vacancies for visible-light-driven oxidation of acetaldehyde, *J. Environ. Chem. Eng.*, 2023,  
183 **11**, 110887.

184 9 X. Jiang, J. Zhou, H. Liu, Y. Chen and C. Lu, Lotus pollen-templated synthesis of C, N, P-self  
185 doped KTi<sub>2</sub>(PO<sub>4</sub>)<sub>3</sub>/TiO<sub>2</sub> for sodium ion battery, *Colloids Surface. A.*, 2022, **650**, 129605.

- 186 10 G. Zhu, X. Yang, Y. Liu, Y. Zeng, T. Wang and H. Yu, One-pot synthesis of C-modified and N-  
187 doped TiO<sub>2</sub> for enhanced visible-light photocatalytic activity, *J. Alloy. Compd.*, 2022, **902**, 163677.  
188
- 189 11 A. N. Kadam, T. T. Salunkhe, H. Kim and S. W. Lee, Biogenic synthesis of mesoporous N-S-C  
190 tri-doped TiO<sub>2</sub> photocatalyst via ultrasonic-assisted derivatization of biotemplate from expired egg  
191 white protein, *Appl. Surf. Sci.*, 2020, **518**, 146194.
- 192 12 J. López-Mercado, M. I. González-Dominguez, F. J. Reynoso-Marin, B. Acosta, E. Smolentseva  
193 and A. Nambo. Green synthesis of TiO<sub>2</sub> for furfural production by photohydrolysis of tortilla  
194 manufacturing waste, *Sci. Rep-UK*, 2023, **13**, 15355.
- 195 13 H. Zeng, J. Xie, H. Xie, B.L. Su, M. Wang, H. Ping, W. Wang, H. Wang and Z. Fu, Bioprocess-  
196 inspired synthesis of hierarchically porous nitrogen-doped TiO<sub>2</sub> with high visible-light  
197 photocatalytic activity, *J. Mater. Chem. A*, 2015, **3**, 19588-19596.
